# Supplementary material for: The safety of a low-protein diet in older adults with advanced chronic kidney disease
Source: PubMed Central journal article supplement (PMC11648958; doi:10.1093/ndt/gfae077), 2024-03-27
Supplement: gfae077_Supplemental_File.pdf [file gfae077_Supplemental_File.pdf]

## SUPPLEMENT ON-LINE

### **The safety of a low protein diet in older adults with advanced chronic kidney disease.**

**Authors:** Karin Windahl, Nicholas C Chesnaye, Gerd Faxén Irving, Peter Stenvinkel, Tora Almquist, Maarit Korkeila Lidén, Christiane Drechsler, Maciej Szymczak, Magdalena Krajewska, Esther de Rooij, Claudia Torino, Gaetana Porto, Fergus J Caskey , Christoph Wanner , Kitty J Jager, Friedo W Dekker, Marie Evans, and the EQUAL study investigators

| CONTENT                                                                                                                                                        | PAGE |
|----------------------------------------------------------------------------------------------------------------------------------------------------------------|------|
| <b>Figure S1.</b> Flow-chart inclusion                                                                                                                         | 2    |
| <b>Table S1.</b> Missing data at baseline                                                                                                                      | 3    |
| <b>Table S2.</b> Baseline characteristics of individuals with measured protein intake.                                                                         | 4    |
| <b>Table S3.</b> Adjusted risk of mortality and decline in subjective global assessment associated with a prescribed low-protein diet, according to subgroups. | 6    |
| <b>Table S4.</b> Sensitivity analyses for the risk of mortality associated with a low protein diet                                                             | 8    |

**Figure S1. Flow-chart inclusion**

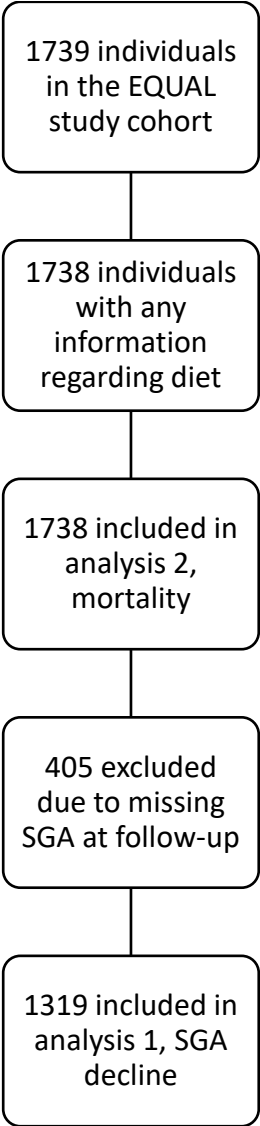

**Table S1 Missing data at baseline**

|                                   | All (n=1738) |
|-----------------------------------|--------------|
|                                   | Numbers (%)  |
| Sex                               | 0            |
| Age                               | 0            |
| Country                           | 0            |
| eGFR mL/min/1.73 <sup>2</sup>     | 63 (3.6)     |
| Blood pressure mmHg               | 83 (4.8)     |
| Body Mass Index kg/m <sup>2</sup> | 150 (8.6)    |
| Hb                                | 79 (4.5)     |
| Potassium                         | 42 (2.4)     |
| Sodium                            | 85 (5.0)     |
| Phosphate                         | 151 (8.7)    |
| Urea                              | 114 (6.6)    |
| Albumin                           | 215 (15.8)   |
| SGA overall score                 | 240 (13.8)   |
| Charlson Comorbidity score        | 42 (2.4)     |
| Diabetes                          | 44 (2.5)     |
| Cerebrovascular disease           | 53 (3.1)     |
| Coronary artery disease           | 78 (4.5)     |
| Malignancy                        | 59 (3.4)     |
| Heart failure                     | 89 (5.2)     |
| Education                         | 345 (19.9)   |
| Marital status                    | 347 (20.0)   |
| Smoking habits                    | 402 (23.1)   |
| Alcohol consumption               | 388 (22.3)   |

**Table S2 Baseline characteristics\* of individuals (n=778) with measured protein intake**

|                                     | Standard diet measured intake >0.8g/kg | Standard diet measured intake <0.8g/kg | Low protein diet measured intake >0.8g/kg* | Low protein diet measured intake <0.8g/kg* |
|-------------------------------------|----------------------------------------|----------------------------------------|--------------------------------------------|--------------------------------------------|
| Female                              | 49 (25)                                | 44 (39)                                | 79 (28)                                    | 72 (31)                                    |
| Age years                           | 73.8 (70-78)                           | 76 (71-80)                             | 76 (70-81)                                 | 75 (69-80)                                 |
| Country n, %                        |                                        |                                        |                                            |                                            |
| Germany                             | 17 (1)                                 | 9 (8)                                  | 3 (1)                                      | 1 (1)                                      |
| Italy                               | 53 (17)                                | 37 (32)                                | 142 (51)                                   | 104 (45)                                   |
| Netherlands                         | 33 (27)                                | 17 (15)                                | 33 (12)                                    | 42 (18)                                    |
| Poland                              | 1 (1)                                  | 2 (2)                                  | -                                          | -                                          |
| Sweden                              | 88 (46)                                | 48 (42)                                | 102 (36)                                   | 82 (36)                                    |
| United Kingdom                      | 1 (9)                                  | 1 (1)                                  | -                                          | -                                          |
| Primary Renal Disease n, %          |                                        |                                        |                                            |                                            |
| Glomerular disease                  | 12 (11)                                | 8 (12)                                 | 17 (10)                                    | 12 (8)                                     |
| Tubulointerstitial disease          | 6 (6)                                  | 4 (6)                                  | 14 (8)                                     | 11 (8)                                     |
| Systemic disease                    | 4 (4)                                  | 1 (1)                                  | 2 (1)                                      | 3 (2)                                      |
| Diabetes                            | 24 (23)                                | 13 (20)                                | 38 (21)                                    | 33 (23)                                    |
| Hypertension, renovascular diseases | 32 (30)                                | 28 (42)                                | 58 (33)                                    | 57 (39)                                    |
| Hereditary diseases                 | 2 (2)                                  | 4 (6)                                  | 3 (2)                                      | 4 (3)                                      |
| Other specified disorders           | 4 (4)                                  | 2 (3)                                  | 7 (4)                                      | 4 (3)                                      |
| Unknown                             | 21 (20)                                | 6 (9)                                  | 38 (21)                                    | 21 (14)                                    |
| Clinical data                       |                                        |                                        |                                            |                                            |
| eGFR mL/min/1.73 <sup>2</sup>       | 18.6 (6.7)                             | 16.0 (5.8)                             | 17.0 (4.8)                                 | 16.3 (5.2)                                 |
| Systolic blood pressure mmHg        | 140 (130-156)                          | 141 (130-154)                          | 140 (129-153)                              | 142 (127-155)                              |
| Diastolic blood pressure mmHg       | 74 (67-83)                             | 72 (66-80)                             | 75 (70-81)                                 | 75 (11.8)                                  |
| Body Mass Index kg/m <sup>2</sup>   | 29 (25-32)                             | 26 (23-29)                             | 28 (25-31)                                 | 27 (24-31)                                 |
| SGA overall score                   | 6.2 (0.9)                              | 5.6 (1.3)                              | 6.2 (0.9)                                  | 6.0 (1.1)                                  |
| Supplement amino acids              | 4 (0.4)                                | 2 (2)                                  | 23 (8)                                     | 25 (11)                                    |
| Laboratory measurements             |                                        |                                        |                                            |                                            |
| Hemoglobin mg/dL                    | 133 (16)                               | 129 (16)                               | 131 (16)                                   | 131 (17)                                   |
| Sodium mmol/L                       | 141 (3)                                | 140 (4)                                | 140 (3)                                    | 140 (4)                                    |
| Potassium mmol/L                    | 4.5 (0.6)                              | 4.5 (0.6)                              | 4.6 (0.6)                                  | 4.6 (0.6)                                  |
| Phosphate mg/dL                     | 1.3 (0.3)                              | 1.4 (0.3)                              | 1.3 (0.3)                                  | 1.3 (0.3)                                  |
| Urea mmol/L                         | 22.4 (10.3)                            | 19.9 (6.9)                             | 24.2 (13.8)                                | 21.8 (9.4)                                 |
| Albumin g/L                         | 38 (5.0)                               | 37 (4.8)                               | 38 (5.7)                                   | 37 (5.8)                                   |
| Cholesterol mmol/L                  | 4.6 (1.4)                              | 4.6 (1.2)                              | 4.4 (1.2)                                  | 4.6 (1.2)                                  |
| Comorbidity                         |                                        |                                        |                                            |                                            |
| Charlson comorbidity index          | 6.9 (1.8)                              | 7.2 (2.0)                              | 7.1 (1.9)                                  | 7.3 (2.0)                                  |
| Diabetes mellitus                   | 81 (42)                                | 44 (39)                                | 131 (47)                                   | 99 (43)                                    |

|                          |          |         |          |          |
|--------------------------|----------|---------|----------|----------|
| Cerebrovascular disease  | 27 (14)  | 30 (26) | 91 (32)  | 65 (28)  |
| Coronary artery disease  | 60 (31)  | 18 (16) | 53 (19)  | 43 (19)  |
| Malignancy               | 33 (17)  | 24 (21) | 61 (22)  | 61 (27)  |
| Heart failure            | 38 (20)  | 22 (19) | 48 (17)  | 47 (21)  |
| Education                |          |         |          |          |
| Low                      | 33 (21)  | 33 (31) | 79 (32)  | 60 (29)  |
| Intermediate             | 87 (54)  | 53 (51) | 123 (49) | 104 (51) |
| High                     | 31 (19)  | 18 (17) | 40 (16)  | 32 (16)  |
| Other                    | 9 (6)    | 1 (1)   | 7 (3)    | 9 (4)    |
| Marital status           |          |         |          |          |
| Married/partner          | 113 (71) | 61 (58) | 175 (71) | 133 (65) |
| Divorced/widowed/single  | 47 (29)  | 44 (42) | 72 (29)  | 71 (35)  |
| Lifestyle                |          |         |          |          |
| Smoking                  |          |         |          |          |
| Never                    | 61 (32)  | 38 (37) | 96 (39)  | 76 (37)  |
| Current smoker           | 89 (46)  | 54 (52) | 134 (55) | 100 (49) |
| Former smoker            | 8 (4)    | 12 (11) | 15 (6)   | 28 (14)  |
| Alcohol consumption      |          |         |          |          |
| No consumption           | 75 (50)  | 55 (54) | 139 (58) | 110 (55) |
| 1-4 standard units/week  | 46 (30)  | 23 (23) | 64 (27)  | 55 (27)  |
| >4-7 standard units/week | 15 (10)  | 10 (10) | 22 (9)   | 14 (7)   |
| >7 standard units/week   | 15 (10)  | 13 (13) | 16 (6)   | 2 (11)1  |

\*the low-protein diet (LPD) exposure was measured as a time-varying covariate. A patient who is in the LPD group could have been either in any of the LPD groups from baseline, or in any of the standard diet groups at baseline. Thus, the groups above are not mutually exclusive.

**Table S3.** Adjusted risk of mortality and decline in subjective global assessment associated with a prescribed low-protein diet, according to subgroups.

| <b>MORTALITY</b>                     |                                            |                                               |                            |
|--------------------------------------|--------------------------------------------|-----------------------------------------------|----------------------------|
|                                      | <b>Adjusted OR (95% CI)</b>                | <b>Adjusted OR (95% CI)</b>                   | <b>p-value interaction</b> |
| <b>Age</b>                           | <b>Age ≤75 years</b>                       | <b>Age &gt; 75 years</b>                      |                            |
| Standard diet                        | Ref.                                       | Ref.                                          |                            |
| Low protein diet ≤0.8 g/kg           | 0.88 (0.55-1.42)                           | 1.37 (0.94-1.98)                              | <0.001                     |
| Low protein diet ≤0.6 g/kg           | 0.77 (0.43-1.36)                           | 1.18 (0.79-1.77)                              | 0.02                       |
| <b>Sex</b>                           | <b>Women</b>                               | <b>Men</b>                                    |                            |
| Low protein diet ≤0.8 g/kg           | n/a                                        | n/a                                           | 0.19                       |
| Low protein diet ≤0.6 g/kg           | n/a                                        | n/a                                           | 0.91                       |
| <b>Subjective global assessment</b>  | <b>SGA score &lt;6</b>                     | <b>SGA score 6-7</b>                          |                            |
| Standard diet                        | Ref.                                       | Ref.                                          |                            |
| Low protein diet ≤0.8 g/kg           | 1.01 (0.73-1.41)                           | 1.74 (0.93-3.127)                             | 0.04                       |
| Low protein diet ≤0.6 g/kg           | n/a                                        | n/a                                           | 0.16                       |
| <b>Comorbidity</b>                   | <b>Charlson comorbidity index score ≤6</b> | <b>Charlson comorbidity index score &gt;6</b> |                            |
| Standard diet                        | Ref.                                       | Ref.                                          |                            |
| Low protein diet ≤0.8 g/kg           | 0.76 (0.45-1.30)                           | 1.34 (0.94-1.90)                              | <0.001                     |
| Low protein diet ≤0.6 g/kg           | 0.64 (0.33-1.23)                           | 1.15 (0.79-1.68)                              | 0.003                      |
| <b>Diabetes mellitus</b>             | <b>Diabetes</b>                            | <b>No diabetes</b>                            |                            |
| Standard diet                        | Ref.                                       | Ref.                                          |                            |
| Low protein diet ≤0.8 g/kg           | n/a                                        | n/a                                           | 0.09                       |
| Low protein diet ≤0.6 g/kg           | n/a                                        | n/a                                           | 0.27                       |
|                                      |                                            |                                               |                            |
|                                      |                                            |                                               |                            |
| <b>DECLINE IN NUTRITIONAL STATUS</b> |                                            |                                               |                            |
|                                      | <b>Adjusted OR (95% CI)</b>                | <b>Adjusted OR (95% CI)</b>                   | <b>p-value interaction</b> |
| <b>Age</b>                           | <b>Age ≤75 years</b>                       | <b>Age &gt; 75 years</b>                      |                            |
| Standard diet                        | Ref.                                       | Ref.                                          |                            |
| Low protein diet ≤0.8 g/kg           | 0.93 (0.48-1.83)                           | 1.16 (0.69-1.93)                              | 0.03                       |
| Low protein diet ≤0.6 g/kg           | 1.07 (0.54-2.13)                           | 1.54 (0.89-2.66)                              | 0.004                      |

| <b>Sex</b>                          | <b>Women</b>                                                | <b>Men</b>                                                 |          |
|-------------------------------------|-------------------------------------------------------------|------------------------------------------------------------|----------|
| Low protein diet $\leq 0.8$ g/kg    | n/a                                                         | n/a                                                        | 0.25     |
| Low protein diet $\leq 0.6$ g/kg    | 1.47 (0.66-3.32)                                            | 1.38 (0.84-2.27)                                           | 0.01     |
| <b>Diabetes</b>                     | <b>Diabetes</b>                                             | <b>No diabetes</b>                                         |          |
| Low protein diet $\leq 0.8$ g/kg    | n/a                                                         | n/a                                                        | 0.21     |
| Low protein diet $\leq 0.6$ g/kg    | 1.40 (0.80-2.45)                                            | 1.43 (0.75-2.75)                                           | 0.04     |
| <b>Subjective global assessment</b> | <b>SGA score <math>&lt;6</math></b>                         | <b>SGA score 6-7</b>                                       |          |
| Low protein diet $\leq 0.8$ g/kg    | n/a                                                         | n/a                                                        | 0.93     |
| Low protein diet $\leq 0.6$ g/kg    | n/a                                                         | n/a                                                        | 0.14     |
| <b>Comorbidity</b>                  | <b>Charlson comorbidity index score <math>\leq 6</math></b> | <b>Charlson comorbidity index score <math>&gt;6</math></b> |          |
| Standard diet                       | Ref.                                                        | Ref.                                                       |          |
| Low protein diet $\leq 0.8$ g/kg    | 1.00 (0.47-2.12)                                            | 1.05 (0.63-1.75)                                           | 0.01     |
| Low protein diet $\leq 0.6$ g/kg    | 0.96 (0.45-2.03)                                            | 1.49 (0.87-2.54)                                           | $<0.001$ |

**Table S4. Sensitivity analyses for the risk of mortality associated with a low protein diet**

| <b>Prescribed diet</b>                          | <b>Unadjusted OR</b> | <b>Adjusted OR*</b>           |
|-------------------------------------------------|----------------------|-------------------------------|
| <b>Imputed missing laboratory values</b>        |                      |                               |
| Standard diet                                   | ref                  | ref                           |
| Low protein diet $\leq 0.8$ g/kg                | 1.11 (0.93-1.35)     | 1.00 (0.78-1.27)              |
| <b>Imputed missing laboratory values</b>        |                      |                               |
| <b>Measured diet (ideal BW)</b>                 | <b>Unadjusted OR</b> | <b>Adjusted OR*</b>           |
| Standard diet, adherent                         | Ref.                 | Ref.                          |
| Low protein diet $\leq 0.8$ g/kg, adherent      | 1.49 (1.03-2.16)     | 0.94 (0.57-1.53) <sup>□</sup> |
| Low protein diet $\leq 0.8$ g/kg, non-adherent  | 1.59 (1.07-2.35)     | 1.10 (0.73-1.64)              |
| Standard diet, spontaneously low protein intake | Ref.                 | Ref.                          |
| Low protein diet $\leq 0.8$ g/kg, adherent      | 1.04 (0.71-1.53)     | 0.98 (0.58-1.68)              |
| <b>According to actual bodyweight</b>           |                      |                               |
| Standard diet, adherent                         | Ref.                 | Ref.                          |
| Low protein diet $\leq 0.8$ g/kg, adherent      | 1.33 (0.91-1.94)     | 1.01 (0.58-1.77)              |
| Low protein diet $\leq 0.8$ g/kg, non-adherent  | 1.23 (0.80-1.87)     | 0.81 (0.40-1.60)              |
| Standard diet, spontaneously low protein intake | Ref.                 | Ref.                          |
| Low protein diet $\leq 0.8$ g/kg, adherent      | 1.16 (0.83-1.61)     | 1.24 (0.75-2.04)              |

□dropped spline and country in outcome model to make the model converge
